# Supplementary material
Source: Royal Society of Chemistry journal article supplement (doi:10.1039/d6py00329j)
Supplement: d6py00329j1.pdf [file d6py00329j1.pdf]

## Supporting Information

### **Dual-dynamic Crosslinked Polyurethanes with Synergistic Mechanical Reinforcement, Self-Healing, Recycling and Photoluminescence**

Haiyan Mao\*, Qi Zhou, Zhi Yu, Chenghui Zheng, Huanling Wu, Ling Lin

School of Textile & Clothing, Yancheng Institute of Technology, Yancheng, 224051, China

\*Corresponding author, email: [mao-hai-yan@hotmail.com](mailto:mao-hai-yan@hotmail.com)

Table S1 Double dynamic crosslinked polyurethane synthesis formula

| Sample | IPDI | PTMG | MDEA | DU    | CA   |
|--------|------|------|------|-------|------|
| HPU    | 2.25 | 1    | 0    | 0.5   | 0    |
| HIPU-1 | 2.25 | 1    | 0.25 | 0.375 | 0.25 |
| HIPU-2 | 2.25 | 1    | 0.5  | 0.25  | 0.5  |
| HIPU-3 | 2.25 | 1    | 0.75 | 0.125 | 0.5  |
| IPU    | 2.25 | 1    | 1    | 0     | 1    |

### Crosslinking density and gel content

The crosslinking density and gel content were examined by swelling method based on the Flory–Rehner theory. All dried samples ( $m_d$ ) were immersed in ethyl acetate (EA) at room temperature to reach equilibrium. Then, the swollen sample were taken out, gently blot off surface solvent with filter paper and weight ( $m_s$ ). In addition, the swollen sample were dried to constant weight ( $m_{d2}$ ). The crosslink density  $\nu$  (mol/cm<sup>3</sup>), molecular weight between crosslinks  $M_c$  (g/mol) and gel content (%) are calculated from:

$$\nu = \frac{-\ln(1 - V_r) - V_r - \chi V_r^2}{V_e (V_r^{1/3} - V_r/2)}$$

$$M_c = \frac{\rho_p}{\nu}$$

$$\text{gel content} = \frac{m_{d2}}{m_d} \times 100\%$$

where,  $\nu$  is crosslinking density (mol/cm<sup>3</sup>),  $V_r$  is polyurethane volume fraction in swollen gel ( $V_r = m_d/m_s$ ),  $V_e$  is molar volume of the EA solvent (cm<sup>3</sup>/mol),  $\chi$  is the polyurethane–EA solvent interaction parameter (0.43).  $M_c$  is molecular weight between crosslinks (g/mol),  $\rho_p$  is the density of HIPUs (1.15 g/cm<sup>3</sup>).

Table S2 Crosslink density, molecular weight between crosslinks and gel content of HIPUs

| Samples                      | HPU                   | HIPU-1                | HIPU-2                | HIPU-3                | IPU                   |
|------------------------------|-----------------------|-----------------------|-----------------------|-----------------------|-----------------------|
| $m_d$ (g)                    | 0.2730                | 0.1525                | 0.3450                | 0.2438                | 0.0811                |
| $m_s$ (g)                    | 0.5053                | 0.3140                | 0.9891                | 0.8692                | 0.3200                |
| $m_{d2}$ (g)                 | 0.2639                | 0.1312                | 0.2394                | 0.1259                | 0.0302                |
| $\nu$ (mol/cm <sup>3</sup> ) | $1.41 \times 10^{-3}$ | $9.68 \times 10^{-4}$ | $3.42 \times 10^{-4}$ | $1.85 \times 10^{-4}$ | $1.44 \times 10^{-4}$ |
| $M_c$ (g/mol)                | 817                   | 1188                  | 3366                  | 6231                  | 7969                  |
| Gel content (%)              | 96.67                 | 86.03                 | 69.39                 | 51.66                 | 37.24                 |

Table S3 Mechanical properties of HIPU-2 after varied hot-pressing cycles

| Cycles   | Tensile strength<br>(MPa) | Elongation at<br>break (%) | Young's<br>modulus (MPa) | Toughness<br>(MJ/m <sup>3</sup> ) |
|----------|---------------------------|----------------------------|--------------------------|-----------------------------------|
| <b>0</b> | 25.68                     | 802                        | 5.01                     | 68.02                             |
| <b>1</b> | 24.80                     | 782                        | 7.92                     | 62.49                             |
| <b>3</b> | 22.84                     | 758                        | 8.21                     | 59.52                             |
| <b>5</b> | 20.00                     | 750                        | 3.65                     | 54.39                             |

Table S4 Comparison of self-healing, recycling efficiencies and photoluminescence of self-healing polyurethanes in previous literatures

| Ref.      | Self-healing motif                                | Healing conditions        | Healing efficiency (%) | Recycling conditions         | Recycling cycle and ratio (%) | Photoluminescence           |
|-----------|---------------------------------------------------|---------------------------|------------------------|------------------------------|-------------------------------|-----------------------------|
| This work | Ionic interactions and H-bonds                    | 80 °C, 12 h               | 88.94                  | 100 °C under 5 MPa for 5 min | 92                            | Yes (without quantum yield) |
| 4         | H-bonds [Multiple H-bonding chain extender-based] | 25 °C, 6 h                | 87.6                   | /                            | /                             | Yes (without quantum yield) |
| 13        | H-bonds and disulfide bonds                       | 25 °C, 48 h<br>60 °C, 3 h | 81<br>99               | DMF solvent                  | 3, without ratio              | No                          |
| 15        | Ionic interactions and H-bonds                    | 25 °C, 168 h              | 92.8                   | Ethanol solvent              | 5, without ratio              | No                          |
| 26        | H-bonds and coordinate interactions               | 80 °C, 10 h               | 91.7                   | /                            | /                             | Yes (without quantum yield) |
| 27        | H-bonds and disulfide bonds                       | 80 °C, 12 h               | 86.1                   | DMF solvent                  | 3, without ratio              | No                          |
| 28        | Disulfide bonds and H-bonds                       | 50 °C, 12 h               | 81.47                  | DMF solvent                  | 5, 91.26                      | No                          |

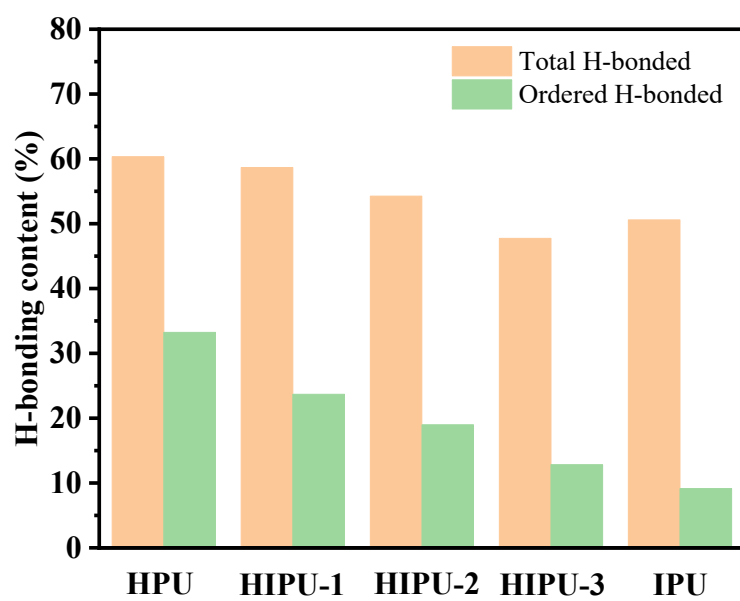

Fig.S1 H-bonding content of HIPUs

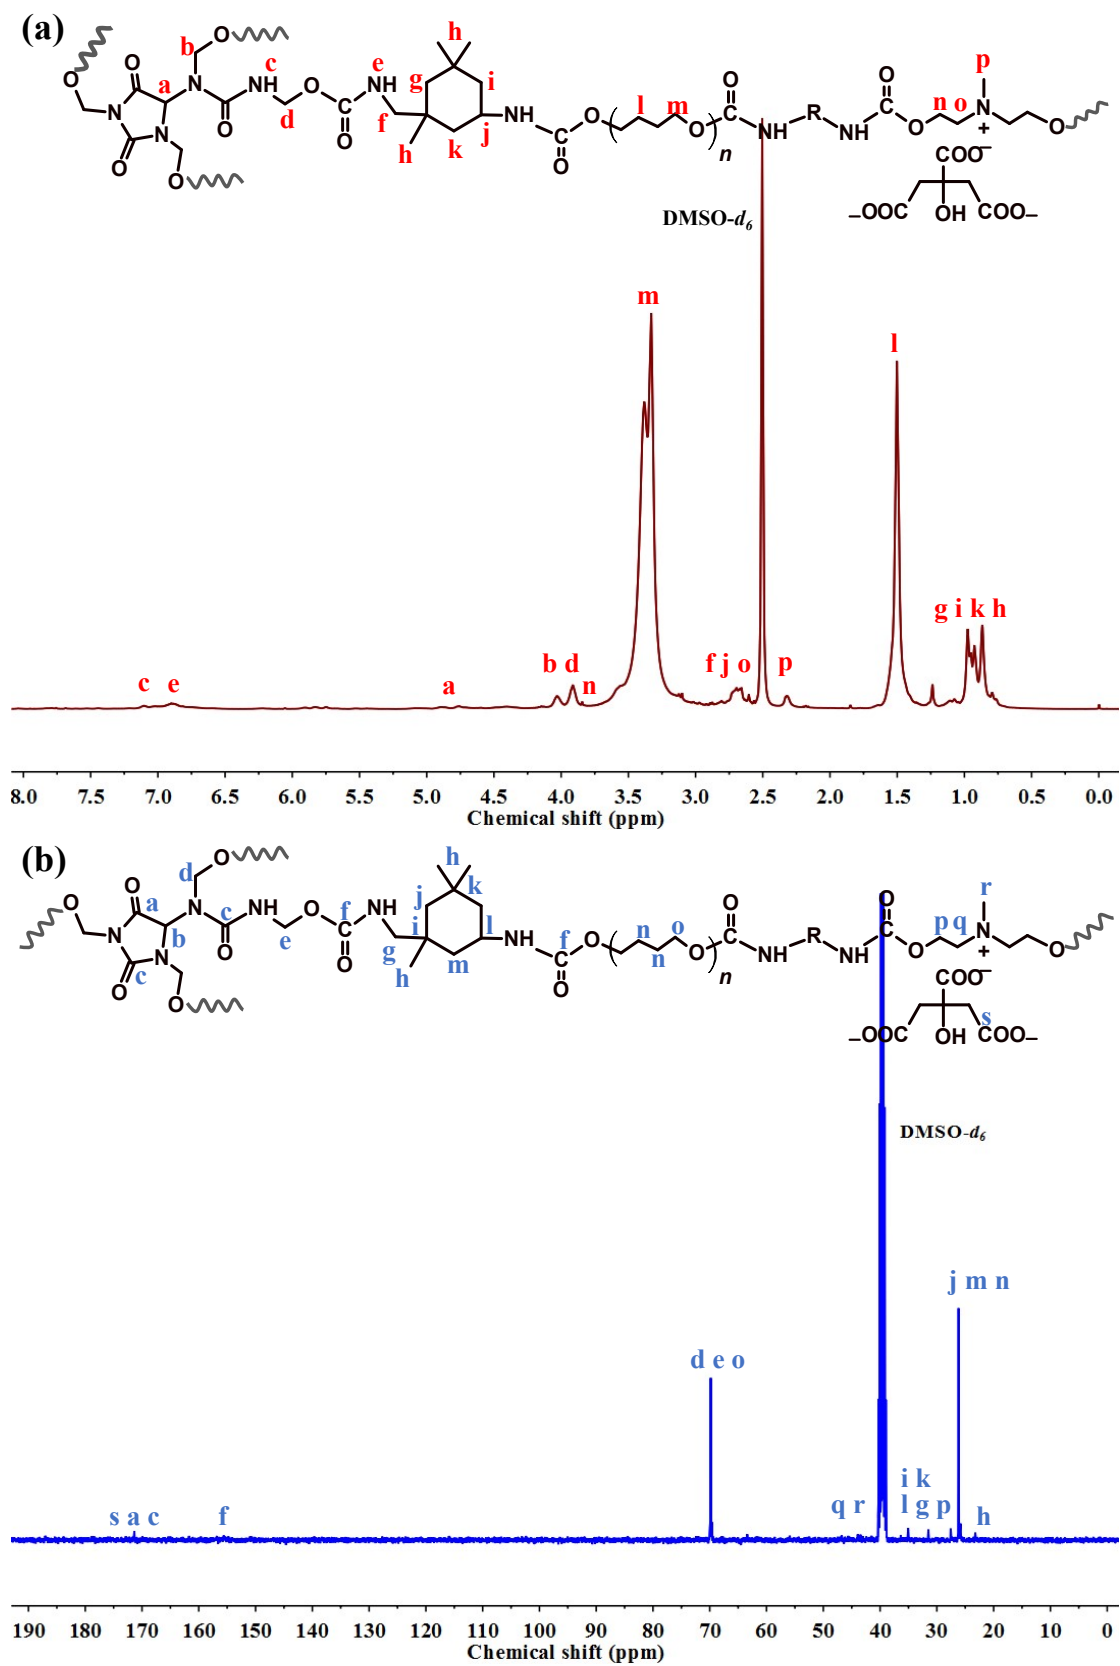

Fig.S2 (a)  $^1\text{H}$  NMR and  $^{13}\text{C}$  NMR spectra of HIPU-2

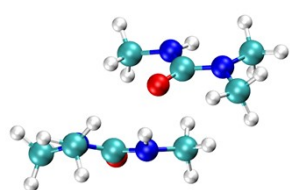

Urea-Urea

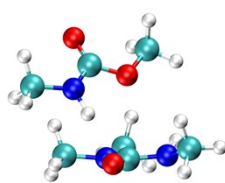

Urea-Carbamate

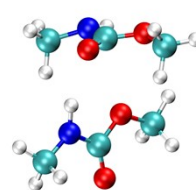

Carbamate-Carbamate

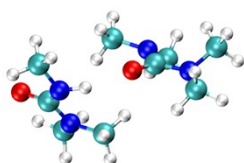

Urea'-Urea

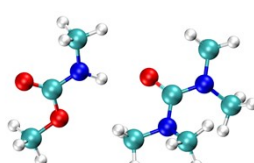

Urea'-Carbamate

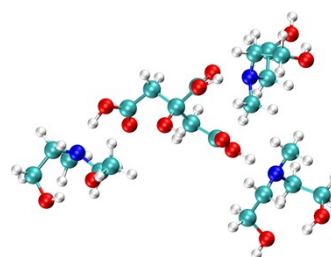

Ionic bond

Fig. S3 Optimized structures of hydrogen bonds and ionic bonds

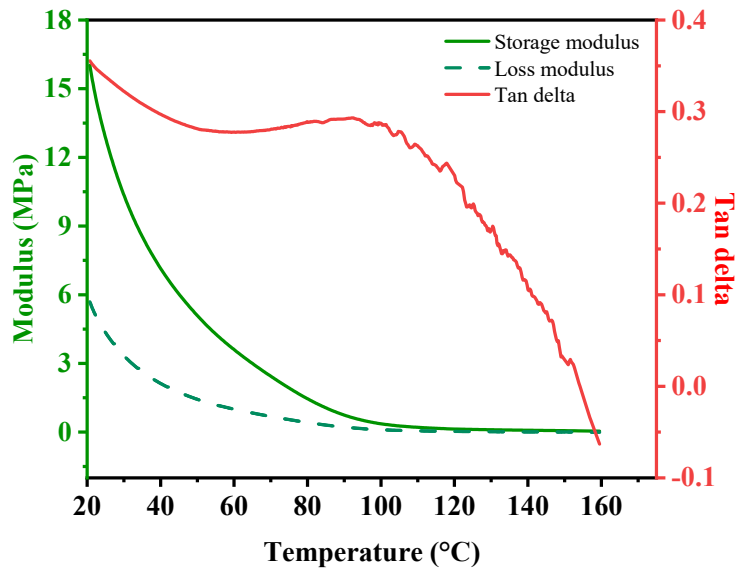

Fig. S4 The storage modulus, loss modulus and tan delta of HIPU-2

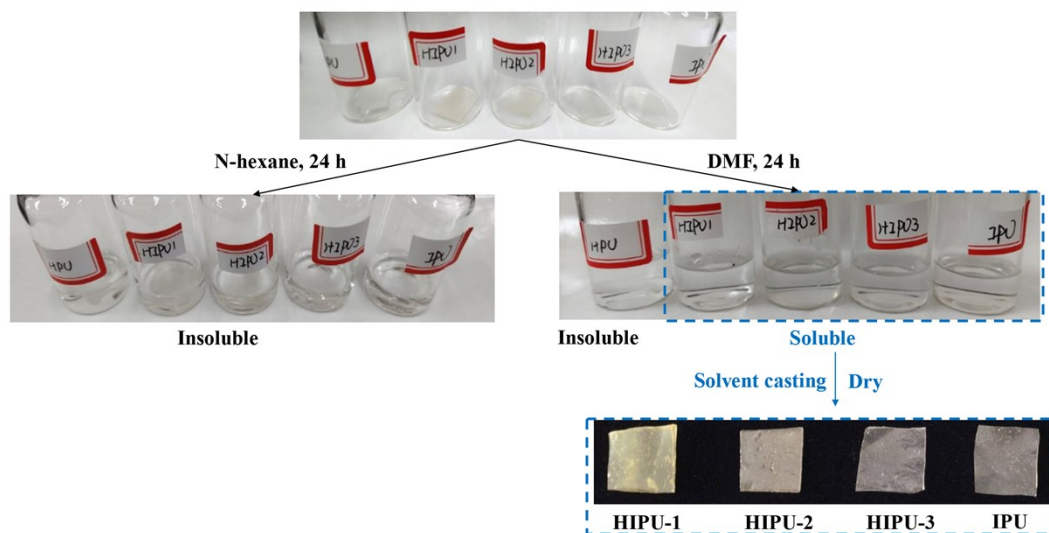

Fig. S5 Solubility and processability of HIPUs in n-hexane and DMF

As shown in Fig.S5, the HIPUs (except HPU) are soluble in polar solvents (e.g., DMF) at room temperature after 24 h, forming a clear homogeneous solution. This is because these strong polar solvents effectively disrupt the intermolecular hydrogen bonds and ionic interactions, confirming the dynamic and reversible nature of the supramolecular network. Moreover, a new film can be re-formed after solvent evaporation, demonstrating solution processability. HIPUs are insoluble in non-polar solvents (e.g., n-hexane), further supporting that the network is non-covalent.

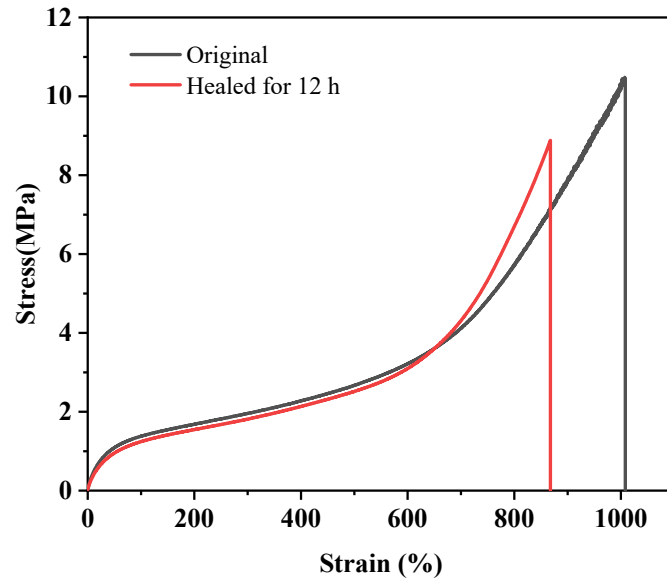

Fig. S6 Stress-strain curves of IPU heated at 80 °C for 12 h

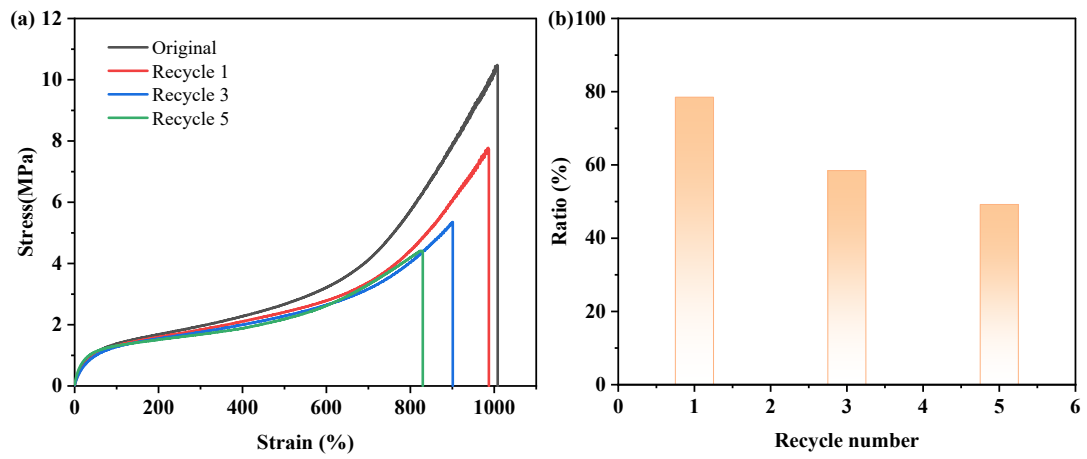

Fig. S7 Recycling properties of IPU: (a) Recyclability of IPU film through hot-pressing; (b) Recycling ratio of IPU

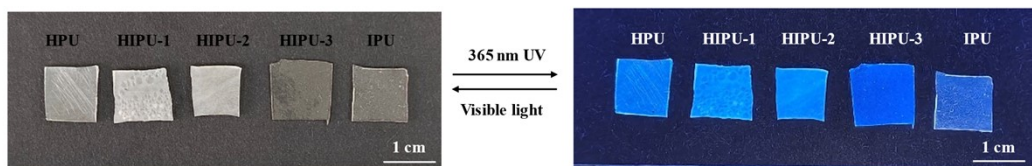

Fig. S8 Photographs of HIPUs under UV irradiation at 365 nm

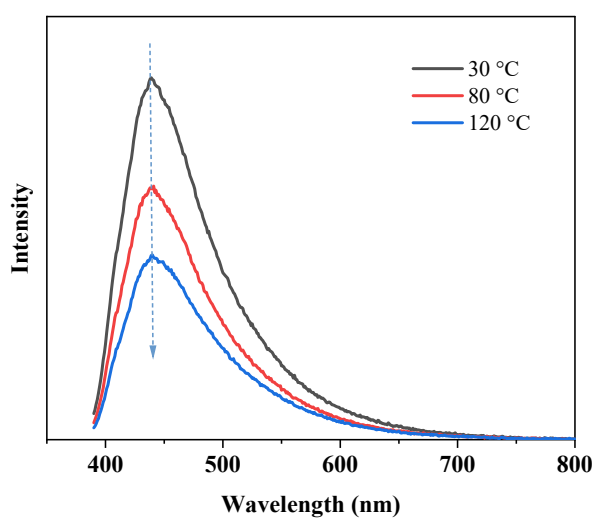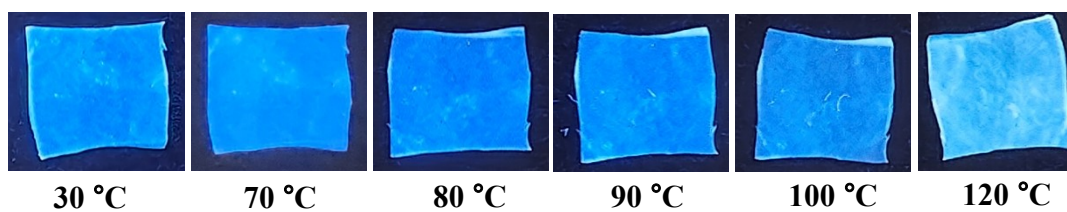

Fig. S9 Photoluminescence spectra of HIPU-2 at different temperatures

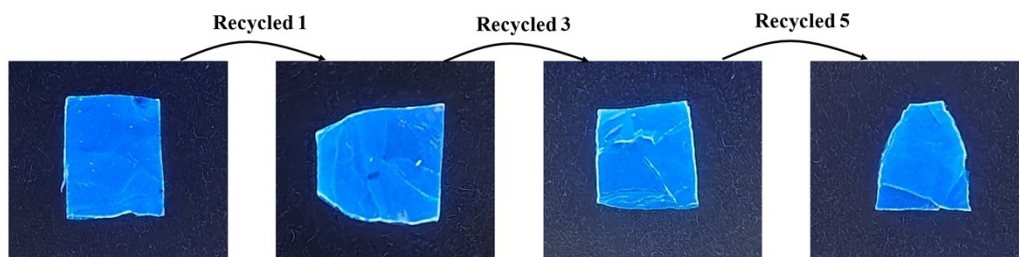

Fig. S10 Photographs of HIPU-2 luminescence after five recycling cycles

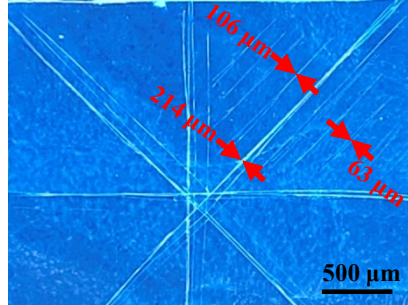

Fig. S11 Luminescent crack detection in HIPU-2
